# Supplementary material for: Facile η5–η3 hapticity interconversion in pentamethylcyclopentadienyl ruthenium(ii) complexes containing a phenylmethallyl (“open indenyl”) ligand
Source: Royal Society of Chemistry journal article supplement (doi:10.1039/c1dt11436k), 2011-01-01

## Electronic Supplementary Information

for

# Facile $\eta^5$ - $\eta^3$ hapticity interconversion in pentamethylcyclopentadienyl ruthenium(II) complexes containing a phenylmethallyl (“open indenyl”) ligand

Andreas Glöckner, Òscar Àrias, Thomas Bannenberg, Constantin G. Daniliuc, Peter G. Jones and

Matthias Tamm <sup>\*[a]</sup>

<sup>a</sup>Institut für Anorganische und Analytische Chemie, Technische Universität  
Braunschweig, Hagenring 30, D-38106 Braunschweig, Germany.

## Contents

- 1. NMR study: Isomerization of *anti*-2 to *syn*-2**
- 2. Computational Details**

## 1. NMR study: Isomerization of *anti*-2 to *syn*-2

A sample of freshly prepared *anti*-[( $\eta^5$ -C<sub>5</sub>Me<sub>5</sub>)Ru( $\eta^3$ -oInd<sup>Me</sup>)(PMe<sub>3</sub>)] (*anti*-2) in C<sub>6</sub>D<sub>6</sub> was sealed in an NMR tube, and the <sup>1</sup>H and <sup>31</sup>P{<sup>1</sup>H} NMR spectra were measured (experiment No. 1). The NMR tube was placed in an oil bath with a constant temperature of 50° C; this time was set as the starting point of the kinetic study. For the following NMR measurements (No. 2 – No. 18), the time was stopped, and the NMR tube was cooled with an ice bath immediately after it was taken out of the oil bath.

The ratio of the *anti*- and *syn*-isomer was determined by the integration of the corresponding peaks in the <sup>31</sup>P NMR, and, as a reference, by the integration of the peaks assigned to the methyl-groups of the C<sub>5</sub>Me<sub>5</sub> ligand in the <sup>1</sup>H NMR. Both ratios for each time are listed below.

| No. | Time  |        |         | <sup>31</sup> P NMR |            | <sup>1</sup> H NMR |            |
|-----|-------|--------|---------|---------------------|------------|--------------------|------------|
|     | days  | hours  | seconds | <i>anti</i>         | <i>syn</i> | <i>anti</i>        | <i>syn</i> |
| 1   | 0.00  | 0.00   | 0       | 98.1%               | 1.9%       | 98.2%              | 1.8%       |
| 2   | 0.68  | 16.33  | 58800   | 67.4%               | 32.6%      | 68.0%              | 32.0%      |
| 3   | 0.95  | 22.87  | 82320   | 58.1%               | 41.9%      | 58.8%              | 41.2%      |
| 4   | 1.60  | 38.37  | 138120  | 41.0%               | 59.0%      | 42.1%              | 57.9%      |
| 5   | 1.94  | 46.62  | 167820  | 34.1%               | 65.9%      | 35.0%              | 65.0%      |
| 6   | 2.58  | 62.03  | 223320  | 23.7%               | 76.3%      | 24.4%              | 77.7%      |
| 7   | 2.85  | 68.32  | 245940  | 21.2%               | 78.8%      | 22.0%              | 78.0%      |
| 8   | 3.80  | 91.08  | 327900  | 13.4%               | 86.6%      | 13.9%              | 86.1%      |
| 9   | 4.75  | 113.95 | 410220  | 8.6%                | 91.4%      | 8.6%               | 91.4%      |
| 10  | 5.61  | 134.60 | 484560  | 6.0%                | 94.0%      | 6.3%               | 93.7%      |
| 11  | 6.52  | 156.38 | 562980  | 4.3%                | 95.7%      | 4.5%               | 95.5%      |
| 12  | 7.74  | 185.80 | 668880  | 3.3%                | 96.7%      | 3.5%               | 96.5%      |
| 13  | 8.73  | 209.57 | 754440  | 2.8%                | 97.2%      | 3.1%               | 96.9%      |
| 14  | 9.71  | 232.95 | 838620  | 2.5%                | 97.5%      | 2.7%               | 97.3%      |
| 15  | 11.48 | 275.57 | 992040  | 1.9%                | 98.1%      | 2.0%               | 98.0%      |
| 16  | 14.39 | 345.33 | 1243200 | 1.6%                | 98.4%      | 1.7%               | 98.3%      |
| 17  | 17.52 | 420.35 | 1513260 | 2.0%                | 98.0%      | 2.1%               | 97.9%      |
| 18  | 21.30 | 511.13 | 1840080 | 2.0%                | 98.0%      | 2.0%               | 98.0%      |

### Plot of the $^{31}\text{P}\{^1\text{H}\}$ spectra

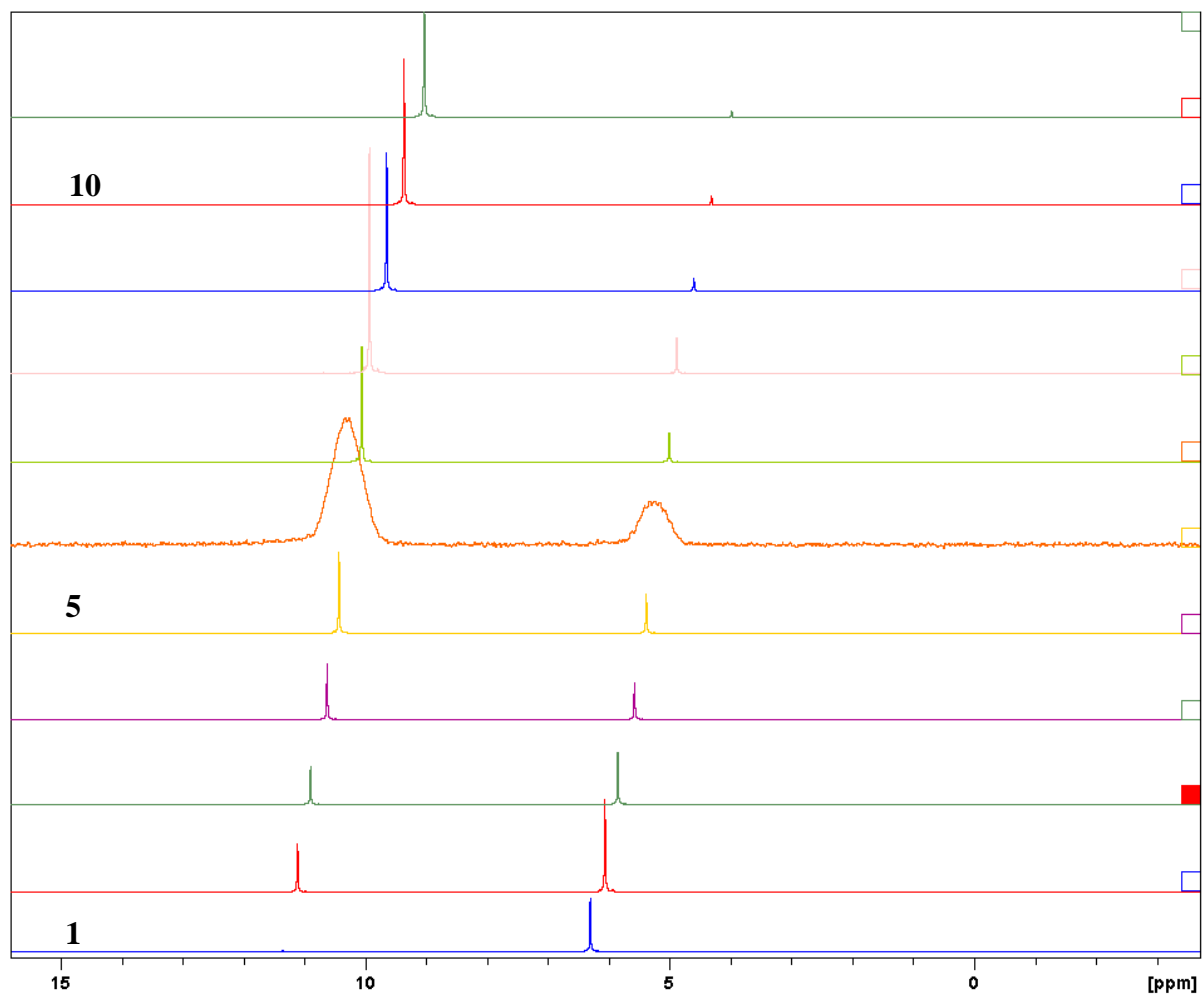

For all, except spectra 6 (Bruker DPX 200), a Bruker AV 300 spectrometer was used.

## Origin Plot for the determination of the rate constant

For the calculations, the results from the first eleven  $^{31}\text{P}\{^1\text{H}\}$  spectra were used.

In case of a first-order reaction proceeding to equilibrium, a plot of  $\ln(A_{\text{syn-2},\infty} - A_{\text{syn-2},t})$  against the time gives the rate constant  $k$  from the slope.<sup>1</sup>  $A$  represents the relative integrals of the  $^{31}\text{P}\{^1\text{H}\}$  NMR signals, with  $A_{\text{syn-2},\infty}$  and  $A_{\text{syn-2},t}$  being the relative integrals at equilibrium and at the time of the measurement, respectively.

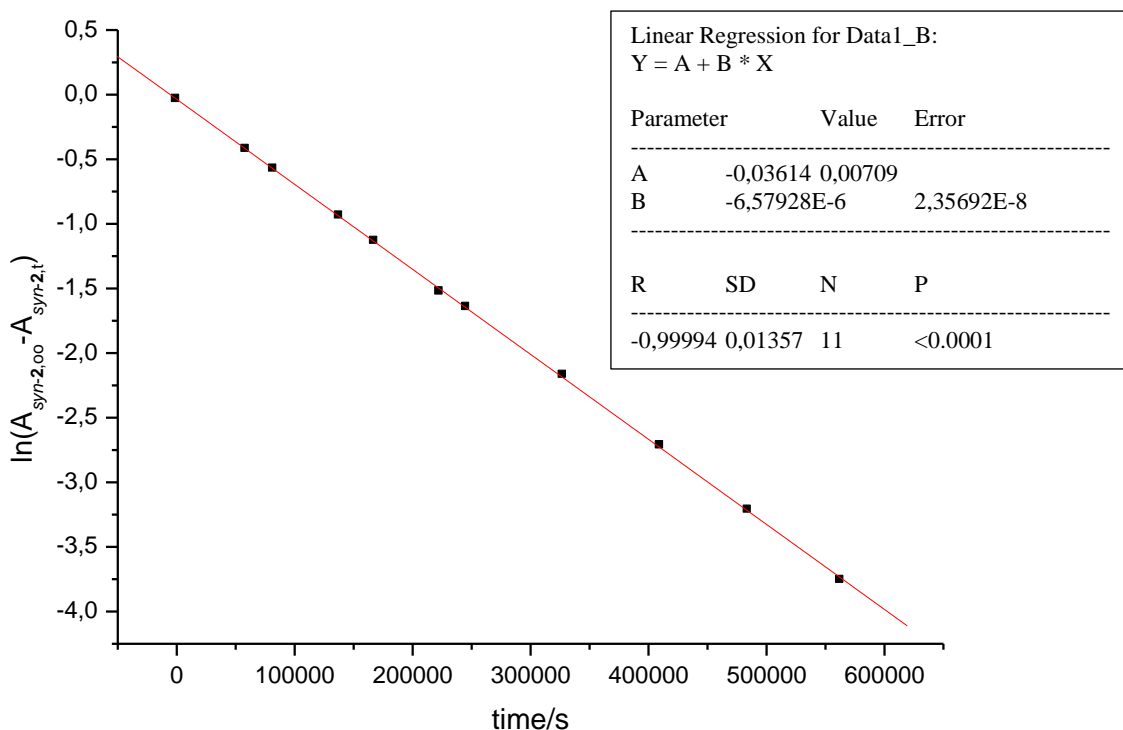

Calculation of the half-life:

$$t_{1/2} = \frac{\ln 2}{k} \Rightarrow t_{1/2} = 105353\text{s} \approx 29,3\text{h}$$

Calculation of the free activation energy:

$$k = \frac{k_B T}{h} e^{-\Delta G^\ddagger / RT} \Leftrightarrow \Delta G^\ddagger = -\ln\left(\frac{kh}{k_B T}\right) RT \Rightarrow \Delta G^\ddagger = -\ln(9.69 \cdot 10^{-19}) RT = 112\text{kJ/mol}$$

$$k = 6.57 \cdot 10^{-6} \text{ s}^{-1}$$

$$h = 6.62 \cdot 10^{-34} \text{ J s}$$

$$k_B = 1.38 \cdot 10^{-23} \text{ J K}^{-1}$$

$$T = 325.15 \text{ K}$$

$$R = 8.31 \text{ J K}^{-1} \text{ mol}^{-1}$$

<sup>1</sup> J. R. Chipperfield, *J. Organomet. Chem.*, 1989, **363**, 253.

## 4. Computational Details

### Energies for the optimized structures:

|             | Compound                                                                                  |     | E(0 K) <sup>a</sup><br>[Ha] | H(298 K) <sup>b</sup><br>[Ha] | G(298 K) <sup>b</sup><br>[Ha] |
|-------------|-------------------------------------------------------------------------------------------|-----|-----------------------------|-------------------------------|-------------------------------|
| <i>syn</i>  | $[(\eta^5\text{-C}_5\text{Me}_5)\text{Ru}(\eta^3\text{-oInd}^{\text{Me}})(\text{PMe}_3)]$ | (2) | -1332.821236                | -1332.790840                  | -1332.876667                  |
| <i>anti</i> | $[(\eta^5\text{-C}_5\text{Me}_5)\text{Ru}(\eta^3\text{-oInd}^{\text{Me}})(\text{PMe}_3)]$ | (2) | -1332.819061                | -1332.788613                  | -1332.874206                  |
| <i>syn</i>  | $[(\eta^5\text{-C}_5\text{Me}_5)\text{Ru}(\eta^3\text{-oInd}^{\text{Me}})(\text{CO})]$    | (3) | -985.210587                 | -985.184905                   | -985.262905                   |
| <i>anti</i> | $[(\eta^5\text{-C}_5\text{Me}_5)\text{Ru}(\eta^3\text{-oInd}^{\text{Me}})(\text{CO})]$    | (3) | -985.208179                 | -985.182693                   | -985.260128                   |

<sup>a</sup>DFT energy incl. ZPE.

<sup>b</sup>standard conditions T = 298.15 K and p = 1 atm.

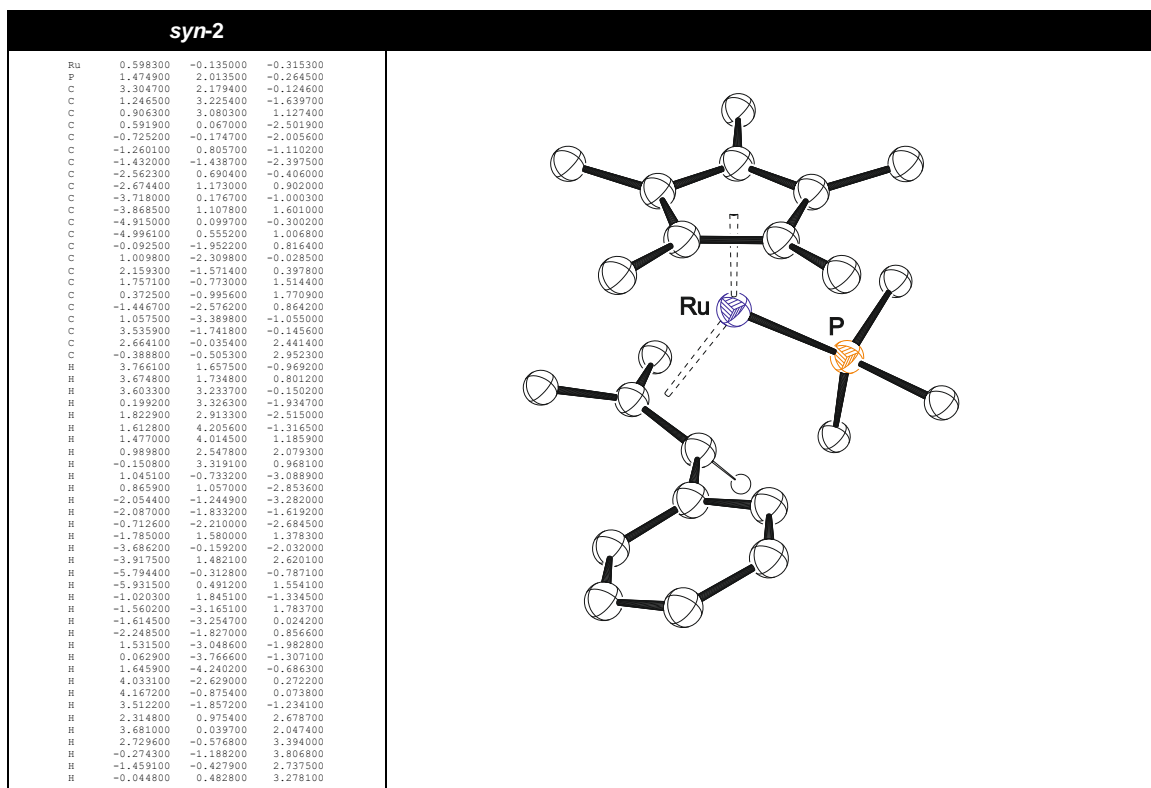

**anti-2**

|    |           |           |           |
|----|-----------|-----------|-----------|
| Ru | 0.622000  | -0.141800 | -0.183600 |
| P  | -0.710200 | 1.756200  | -0.550600 |
| C  | 0.184300  | 3.094700  | -1.449100 |
| C  | -2.248500 | 1.811300  | -1.562500 |
| C  | -1.342800 | 2.658600  | 0.926700  |
| C  | -0.292200 | -0.901400 | -2.050900 |
| C  | -0.393000 | -1.841900 | -0.987700 |
| C  | -1.086600 | -1.473000 | 0.216600  |
| C  | -2.490100 | -1.027000 | 0.297800  |
| C  | -3.414000 | -1.286300 | -0.717900 |
| C  | -4.742200 | -0.901000 | -0.595000 |
| C  | -5.184300 | -0.259000 | 0.552900  |
| C  | -4.284800 | -0.022300 | 1.587300  |
| C  | -2.960000 | -0.405700 | 1.460400  |
| C  | 0.262800  | -3.184800 | -1.111700 |
| C  | 2.165600  | -1.183000 | 1.048300  |
| C  | 2.736200  | -0.870900 | -0.230000 |
| C  | 2.771200  | 0.551000  | -0.369000 |
| C  | 2.227900  | 1.107900  | 0.830900  |
| C  | 1.834100  | 0.047100  | 1.698700  |
| C  | 2.096200  | -2.513800 | 1.715700  |
| C  | 3.385800  | -1.810000 | -1.187600 |
| C  | 3.422200  | 1.280300  | -1.494100 |
| C  | 2.326800  | 2.535200  | 1.254700  |
| C  | 1.333800  | 0.186200  | 3.094700  |
| H  | 0.528000  | 2.695200  | -2.408800 |
| H  | 1.053900  | 3.437800  | -0.887600 |
| H  | -0.476500 | 3.949800  | -1.632400 |
| H  | -3.015000 | 1.146200  | -1.173600 |
| H  | -2.036400 | 1.551400  | -2.601700 |
| H  | -2.631800 | 2.843200  | -1.542100 |
| H  | -1.898800 | 3.664200  | 0.658600  |
| H  | -0.578700 | 2.735100  | 1.703200  |
| H  | -2.186000 | 2.092900  | 1.334500  |
| H  | 0.352500  | -1.182600 | -2.885400 |
| H  | -1.147900 | -0.308400 | -2.354100 |
| H  | -0.840300 | -2.118200 | 1.069300  |
| H  | -3.077400 | -1.802700 | -1.613700 |
| H  | -5.439500 | -1.111300 | -1.401500 |
| H  | -6.222800 | 0.042700  | 0.648800  |
| H  | -4.622100 | 0.463400  | 2.498900  |
| H  | -2.248700 | -0.212300 | 2.263000  |
| H  | -0.463600 | -3.887500 | -1.542200 |
| H  | 0.564700  | -3.594400 | -0.144000 |
| H  | 1.126900  | -3.164900 | -1.782800 |
| H  | 2.779400  | -2.542700 | 2.575200  |
| H  | 2.382100  | -3.328900 | 1.047400  |
| H  | 1.092600  | -2.733500 | 2.099900  |
| H  | 3.075000  | -1.617900 | -2.220600 |
| H  | 3.160400  | -2.854600 | -0.961300 |
| H  | 4.477100  | -1.694300 | -1.152100 |
| H  | 4.517000  | 1.283400  | -1.393900 |
| H  | 3.095300  | -2.323000 | -1.550700 |
| H  | 3.181300  | 0.816100  | -2.456300 |
| H  | 1.418400  | 2.915300  | 1.730900  |
| H  | 2.577700  | 3.201000  | 0.425500  |
| H  | 3.131900  | -2.632000 | 1.984500  |
| H  | 2.156000  | 0.165600  | 3.825200  |
| H  | 0.644200  | -0.624100 | 3.353300  |
| H  | 0.795400  | 1.129100  | 3.234300  |

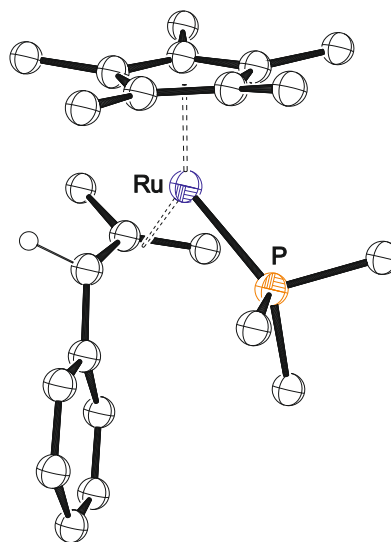

**syn-3**

|    |           |           |           |
|----|-----------|-----------|-----------|
| Ru | -0.770700 | 0.020600  | 0.527400  |
| O  | -1.263800 | -1.909600 | 2.791200  |
| C  | -1.052000 | -1.157600 | 2.942600  |
| C  | -0.734800 | 1.597000  | 2.084600  |
| C  | 0.494400  | 1.577700  | 1.369100  |
| C  | 1.253500  | 0.375100  | 1.448000  |
| C  | 0.842200  | 2.749700  | -1.498300 |
| C  | 2.483900  | 0.046400  | 0.696500  |
| C  | 2.731100  | -1.298500 | 0.396600  |
| C  | 3.446800  | 0.982000  | 0.312400  |
| C  | 3.869400  | -1.698800 | -0.226800 |
| C  | 4.586100  | 0.593900  | -0.382000 |
| C  | 4.800600  | -0.739400 | -0.692800 |
| C  | -0.469600 | 0.217400  | -1.742900 |
| C  | -1.583100 | 1.025500  | -1.366500 |
| C  | -2.578500 | 0.178500  | -0.783800 |
| C  | -2.071400 | -1.159600 | -0.813500 |
| C  | -0.765300 | -1.139000 | -1.404700 |
| C  | 0.762000  | 0.645700  | -2.465700 |
| C  | -1.789200 | 2.473400  | -1.649700 |
| C  | -3.938800 | 0.611700  | -0.361900 |
| C  | -2.823600 | -2.383800 | 0.217400  |
| C  | 0.078500  | -2.316500 | -1.754700 |
| H  | -0.802200 | 1.143200  | 3.069700  |
| H  | -1.381300 | 2.463200  | 1.948900  |
| H  | -0.053000 | 3.328700  | 0.256500  |
| H  | 1.345600  | -2.473400 | -0.431100 |
| H  | 1.515300  | 3.420500  | 1.048500  |
| H  | 1.990100  | -2.037000 | 0.696300  |
| H  | 3.320800  | 2.026700  | 0.576200  |
| H  | 4.030300  | -2.739900 | -0.509500 |
| H  | 5.317200  | 1.343400  | -0.671000 |
| H  | 5.690900  | -1.040800 | -1.236000 |
| H  | 1.191800  | -0.163100 | 2.393700  |
| H  | 1.670700  | 0.252400  | -1.993400 |
| H  | 0.855200  | 1.734200  | -2.511800 |
| H  | 0.745500  | 0.275700  | -3.498500 |
| H  | -0.856500 | 2.988200  | -1.892900 |
| H  | -2.246400 | 2.989500  | -0.739800 |
| H  | -2.467200 | 2.601800  | -2.503200 |
| H  | -4.628100 | 0.653100  | -1.216400 |
| H  | -3.912700 | 1.608300  | 0.089800  |
| H  | -4.366900 | +0.070100 | 0.377800  |
| H  | -3.524700 | -2.181000 | 0.399800  |
| H  | -2.152400 | -3.179800 | -0.079000 |
| H  | -3.401000 | -2.772800 | -1.262700 |
| H  | -0.131000 | -2.658800 | -2.777900 |
| H  | 0.109100  | -3.159500 | -1.081600 |
| H  | 1.142200  | -2.075800 | -1.697500 |

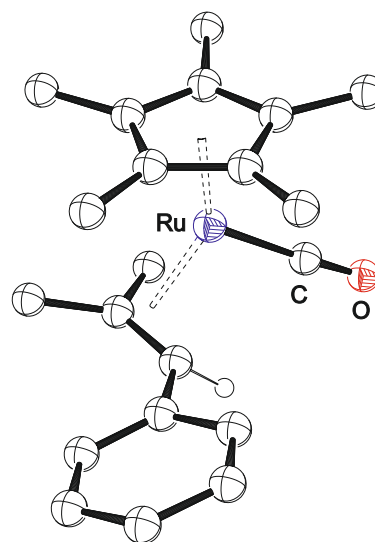

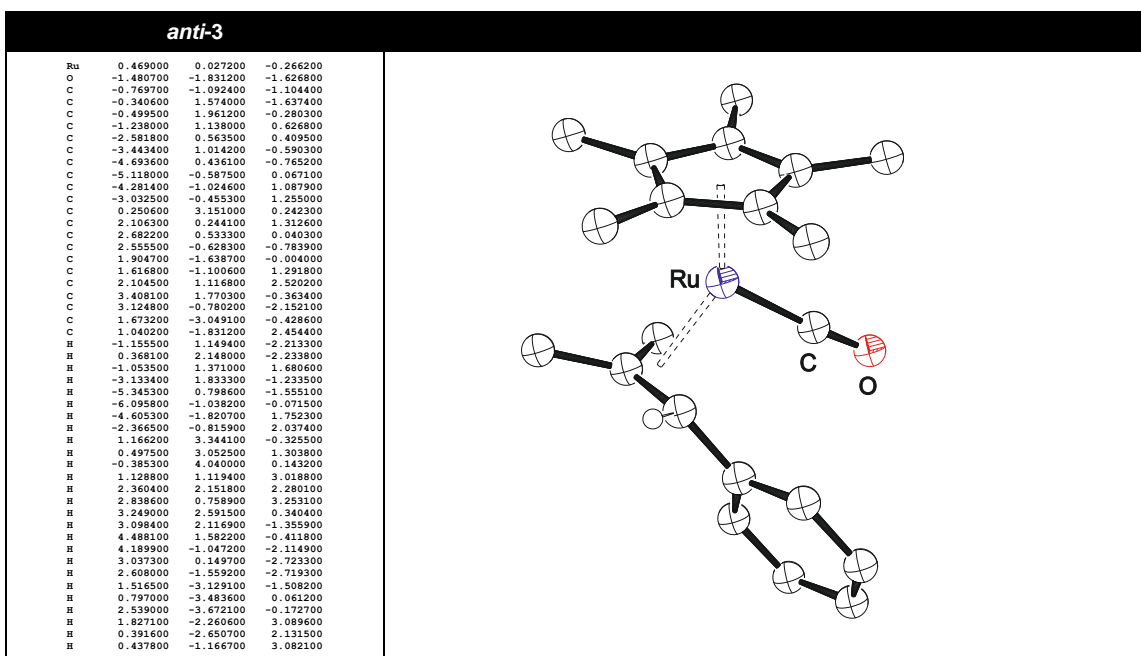

Supplement: c1dt11436k.pdf [file c1dt11436k.pdf]
